# Supplementary material for: Core outcome set for studies on pregnant women with vasa previa (COVasP): a study protocol
Source: PubMed Central journal article supplement — BMJ Open. 2020 Jul 19;10(7):e034018. doi: 10.1136/bmjopen-2019-034018 (PMC7371138; doi:10.1136/bmjopen-2019-034018), 2020-07-19
Supplement: bmjopen-2019-034018supp001.pdf [file bmjopen-2019-034018supp001.pdf]

## COVasP – Interview Guide

|                                                            |  |
|------------------------------------------------------------|--|
| ID number                                                  |  |
| Interview date                                             |  |
| Country                                                    |  |
| Date/ Year of diagnosis of vasa previa                     |  |
| Age                                                        |  |
| Sex and Gender                                             |  |
| Education                                                  |  |
| Profession                                                 |  |
| Ethnicity                                                  |  |
| Marital status (of women with vasa previa)                 |  |
| Parity                                                     |  |
| Method of conception (In vitro fertilization /spontaneous) |  |

**Introduction**

- Explain the objectives of the study to potential participants.
- Check whether they have any questions and answer their queries.
- Check if they are still happy to participate in research.

## COVasP – Interview Guide

**Women and family members**

1. Could you describe your experience of vasa previa in your own words?
2. Do you recall being told about the diagnosis vasa previa? What was your reaction?
3. Can you tell me about any questions that you/ your partner sought answers to when you were diagnosed with vasa previa?
4. As you/ your partner progressed through the pregnancy, were there any specific considerations or concerns that arose?
  - Which of these have been the most important to you?
5. Can you tell me about the care that was offered to you/ your partner?
6. Can you tell me what extra monitoring you/ your partner received during pregnancy?
  - How did you feel about this extra monitoring?
  - How did you decide on undertaking this extra monitoring?
7. Tell me about the birth plan that was offered to you/ your partner?
  - How did you feel about this?
  - How did you decide on undertaking this?
8. Think about when you/ your partner had vasa previa during your pregnancy, and how you might decide if the care for vasa previa has worked?
9. When it comes to your baby specifically, what did you think most about? What aspects of their health did you take into consideration?
10. Overall in terms of your (partner's) health, or your baby's health, what matters most to you?
11. Is there anything that you have been thinking about in relation to pregnancy and having a child, that you feel did not get addressed?
  - (If yes), can you please tell me more about it?

### COVasP – Interview Guide

12. What are the main pieces of advice you would share with a friend with vasa previa?
  - Probe: we're interested in hearing about any aspect of your care, health or well-being.
13. In your opinion, what is an outcome?
14. What outcomes do you think are essential and should be measured?
  - Probe: These outcomes may be related to you (your partner) and/or your baby
15. Can you tell me if your opinion on what is important has changed over time?
16. Is there anything else you would like to add?
17. Would you be interested in an online survey a few months from now?

### Other Stakeholders

1. Based on experience, what are some considerations you typically have while caring for women with vasa previa?
2. What aspects of mother's or baby's health matter most to you when caring for these women?
3. What outcomes influence your management of women with vasa previa?
4. What are some concerns and negative or positive experiences that these women typically share with you?
5. What are the main pieces of advice you would share with a colleague who does not care for this population as frequently as you do?
6. In your opinion, what is an outcome?
7. What outcomes do you think are essential and, therefore, need to be measured in research?
  - Probe: These outcomes may be maternal and/or fetal/neonatal
  - Do you discuss any of these with women? (If yes) Which one?
8. Is there anything else you would like to add?
9. Would you be interested in participating in an online survey a few months from now?
